# Supplementary material
Source: Springer Nature journal article supplement (https://www.springermedizin.de/resource/supplementary/13643_2013_223_MOESM8_ESM.pdf/9681846)
Supplement: MOESM8 [file 9681846]

Additional file 8. Risk of bias assessments for included studies.

|                                                              | BI vs. no BI |              | BI vs. written info |                  |                 |
|--------------------------------------------------------------|--------------|--------------|---------------------|------------------|-----------------|
|                                                              | Beer 2007    | Humenik 2006 | Be mate in 2009     | Za hrad nik 2006 | Be mate in 2005 |
| Random sequence generation                                   | +            | +            | +                   | ?                | +               |
| Allocation concealment                                       | ?            | +            | ?                   | ?                | +               |
| Blinding participants and personnel                          | ●            | ●            | ●                   | ●                | ●               |
| Blinding assessors – Substance use                           | -            | -            | ?                   | ?                | +               |
| Blinding assessors – Frequency of use                        | ●            | -            | ?                   | -                | -               |
| Blinding assessors – Quantity of use                         | -            | -            | -                   | ?                | +               |
| Blinding assessors – Harms/negative consequences             | -            | -            | ?                   | -                | -               |
| Blinding assessors – Positive behaviour change               | -            | -            | ?                   | -                | -               |
| Blinding assessors – Decision to attend treatment            | -            | -            | -                   | -                | ● <sup>a</sup>  |
| Blinding assessors – Composite outcomes                      | -            | ●            | -                   | -                | -               |
| Blinding assessors – Use of different substances             | -            | -            | -                   | -                | ● <sup>a</sup>  |
| Blinding assessors – Intention to reduce use                 | -            | -            | -                   | -                | -               |
| Blinding assessors – Other health measures (objective)       | +            | -            | -                   | -                | -               |
| Blinding assessors – Other health measures (subjective)      | ●            | -            | ?                   | -                | ●               |
| Blinding assessors – Other adverse outcomes                  | -            | -            | -                   | -                | -               |
| Incomplete outcome data – Substance use                      | -            | -            | ●                   | +                | ?               |
| Incomplete outcome data – Frequency of use                   | ●            | -            | ●                   | -                | -               |
| Incomplete outcome data – Quantity of use                    | -            | -            | -                   | ?                | ?               |
| Incomplete outcome data – Harms/negative consequences        | -            | -            | ●                   | -                | -               |
| Incomplete outcome data – Positive behaviour change          | -            | -            | ●                   | -                | -               |
| Incomplete outcome data – Decision to attend treatment       | -            | -            | -                   | -                | ● <sup>a</sup>  |
| Incomplete outcome data – Composite outcomes                 | -            | ?            | -                   | -                | -               |
| Incomplete outcome data – Use of different substances        | -            | -            | -                   | -                | ?               |
| Incomplete outcome data – Intention to reduce use            | -            | -            | -                   | -                | -               |
| Incomplete outcome data – Other health measures (objective)  | ●            | -            | -                   | -                | -               |
| Incomplete outcome data – Other health measures (subjective) | ●            | -            | ●                   | -                | ?               |
| Incomplete outcome data – Other adverse outcomes             | -            | -            | -                   | -                | -               |
| Selective reporting                                          | ●            | ●            | ?                   | ?                | ●               |
| Other bias                                                   | ●            | ?            | +                   | ?                | ●               |

Abbreviations: BI=brief intervention; info=information; vs.= versus. Outcomes not reported in a study denoted by “-“.

<sup>a</sup>Risk of bias assessed by outcome data poorly reported by authors.

Legend: + = low risk of bias, ? = unclear risk of bias, ● = high risk of bias
